# Supplementary material for: Effect of immunomodulation on cardiac remodelling and outcomes in heart failure: a quantitative synthesis of the literature
Source: PubMed Central journal article supplement — ESC Heart Fail. 2020 Mar 21;7(3):1319–30. doi: 10.1002/ehf2.12681 (PMC7261557; doi:10.1002/ehf2.12681), 2020-03-21
Supplement: EHF2-7-1319-s001.pdf [file EHF2-7-1319-s001.pdf]

## **SUPPLEMENTAL MATERIAL**

### **Effect of Immunomodulation on Cardiac Remodeling and Outcomes in Heart Failure: A Quantitative Synthesis of the Literature**

Navkaranbir S. Bajaj, MD, MPH<sup>1,2,3\*</sup>, Kartik Gupta, MD<sup>1\*</sup>, Nitin Gharpure<sup>1\*</sup>, Mike Pate<sup>1</sup>,  
Lakshay Chopra<sup>1</sup>, Rajat Kalra, MD<sup>4</sup>, Sumanth D Prabhu MD<sup>1,2</sup>

---

#### **Affiliations:**

<sup>1</sup>Division of Cardiovascular Disease, University of Alabama at Birmingham, Birmingham, AL, U.S.A.

<sup>2</sup>Cardiology Service, Birmingham Veterans Affairs Medical Center, Birmingham, AL, U.S.A.

<sup>3</sup>Division of Molecular Imaging and Therapeutics, Department of Radiology, University of Alabama at Birmingham, Birmingham, AL, U.S.A.

<sup>4</sup>Cardiovascular Division, University of Minnesota, Minneapolis, MN, U.S.A

**Short Title:** Immunomodulation, cardiac remodeling, and risk

**Conflicts of Interest:** None of the authors had any conflicts of interest or financial disclosures to declare.

**Funding:** Dr. Bajaj is supported by Walter B. Frommeyer, Jr. Fellowship in Investigative Medicine awarded by the University of Alabama at Birmingham, American College of Cardiology Presidential Career Development Award and National Center for Advancing Translational Research of the National Institutes of Health under award number UL1TR001417. Dr. Prabhu is supported by NIH R01 grants HL125735 and HL147549, and a VA Merit Award I01 BX002706.

**\* Contributed equally**

#### **Corresponding Author:**

Sumanth D. Prabhu, MD  
Division of Cardiovascular Disease  
1900 University Boulevard, 311 THT  
The University of Alabama at Birmingham  
Birmingham, AL 35294-0006

United States of America

Phone Number: 205-934-3624

Electronic Mail Address: [sprabhu@uab.edu](mailto:sprabhu@uab.edu)

Facsimile Exchange Number: 205-975-5150

**S1 Supplement Table 1: PRISMA checklist**

| Section/Topic             | # | Checklist Item                                                                                                                                                                                                                                                                                              | Reported on Page #       |
|---------------------------|---|-------------------------------------------------------------------------------------------------------------------------------------------------------------------------------------------------------------------------------------------------------------------------------------------------------------|--------------------------|
| <b>TITLE</b>              |   |                                                                                                                                                                                                                                                                                                             |                          |
| Title                     | 1 | Identify the report as a systematic review, meta-analysis, or both.                                                                                                                                                                                                                                         | Page 1, Title            |
| <b>ABSTRACT</b>           |   |                                                                                                                                                                                                                                                                                                             |                          |
| Structured summary        | 2 | Provide a structured summary including, as applicable: background; objectives; data sources; study eligibility criteria, participants, and interventions; study appraisal and synthesis methods; results; limitations; conclusions and implications of key findings; systematic review registration number. | Page 2-3, paragraphs 1-3 |
| <b>INTRODUCTION</b>       |   |                                                                                                                                                                                                                                                                                                             |                          |
| Rationale                 | 3 | Describe the rationale for the review in the context of what is already known.                                                                                                                                                                                                                              | Page 4, paragraph 1      |
| Objectives                | 4 | Provide an explicit statement of questions being addressed with reference to participants, interventions, comparisons, outcomes, and study design (PICOS).                                                                                                                                                  | Page 4 paragraph 2       |
| <b>METHODS</b>            |   |                                                                                                                                                                                                                                                                                                             |                          |
| Protocol and registration | 5 | Indicate if a review protocol exists, if and where it can be accessed (e.g., Web address), and, if available, provide registration information including registration number.                                                                                                                               | Page 5, paragraph 2, 3   |
| Eligibility criteria      | 6 | Specify study characteristics (e.g., PICOS, length of follow-up) and report characteristics (e.g., years considered, language, publication status) used as criteria for eligibility, giving rationale.                                                                                                      | Page 5, paragraph 4      |
| Information sources       | 7 | Describe all information sources (e.g., databases with dates of coverage, contact with study authors to identify additional studies) in the search and date last searched.                                                                                                                                  | Page 5, paragraph 5      |
| Search                    | 8 | Present full electronic search strategy for at least one database, including any limits used, such that it could be repeated.                                                                                                                                                                               | Page 5, paragraph 5      |

|                                    |          |                                                                                                                                                                                                                        |                           |
|------------------------------------|----------|------------------------------------------------------------------------------------------------------------------------------------------------------------------------------------------------------------------------|---------------------------|
| Study selection                    | 9        | State the process for selecting studies (i.e., screening, eligibility, included in systematic review, and, if applicable, included in the meta-analysis).                                                              | Page 5, paragraph 5       |
| Data collection process            | 10       | Describe method of data extraction from reports (e.g., piloted forms, independently, in duplicate) and any processes for obtaining and confirming data from investigators.                                             | Page 5, paragraph 5       |
| Data items                         | 11       | List and define all variables for which data were sought (e.g., PICOS, funding sources) and any assumptions and simplifications made.                                                                                  | Page 6, paragraph 1       |
| Risk of bias in individual studies | 12       | Describe methods used for assessing risk of bias of individual studies (including specification of whether this was done at the study or outcome level), and how this information is to be used in any data synthesis. | Page 6, paragraph 2       |
| Summary measures                   | 13       | State the principal summary measures (e.g., risk ratio, difference in means).                                                                                                                                          | Page 6, paragraph 4       |
| Synthesis of results               | 14       | Describe the methods of handling data and combining results of studies, if done, including measures of consistency (e.g., $I^2$ ) for each meta-analysis.                                                              | Page 6, paragraph 4       |
| <b>Section/Topic</b>               | <b>#</b> | <b>Checklist Item</b>                                                                                                                                                                                                  | <b>Reported on Page #</b> |
| Risk of bias across studies        | 15       | Specify any assessment of risk of bias that may affect the cumulative evidence (e.g., publication bias, selective reporting within studies).                                                                           | Page 7, paragraph 1       |
| Additional analyses                | 16       | Describe methods of additional analyses (e.g., sensitivity or subgroup analyses, meta-regression), if done, indicating which were pre-specified.                                                                       | Page 7, paragraph 2       |
| <b>RESULTS</b>                     |          |                                                                                                                                                                                                                        |                           |
| Study selection                    | 17       | Give numbers of studies screened, assessed for eligibility, and included in the review, with reasons for exclusions at each stage, ideally with a flow diagram.                                                        | Page 8, paragraph 1       |
| Study characteristics              | 18       | For each study, present characteristics for which data were extracted (e.g., study size, PICOS, follow-up period) and provide the citations.                                                                           | Page 8, paragraph 1       |
| Risk of bias within studies        | 19       | Present data on risk of bias of each study and, if available, any outcome level assessment (see item 12).                                                                                                              | Page 8, paragraph 1       |

|                               |    |                                                                                                                                                                                                          |                                                   |
|-------------------------------|----|----------------------------------------------------------------------------------------------------------------------------------------------------------------------------------------------------------|---------------------------------------------------|
| Results of individual studies | 20 | For all outcomes considered (benefits or harms), present, for each study: (a) simple summary data for each intervention group (b) effect estimates and confidence intervals, ideally with a forest plot. | Page 8, paragraph 2;<br>Page 9, paragraph 1, 2    |
| Synthesis of results          | 21 | Present results of each meta-analysis done, including confidence intervals and measures of consistency.                                                                                                  | Page 8, paragraph 1, 2;<br>Page 9, paragraph 1, 2 |
| Risk of bias across studies   | 22 | Present results of any assessment of risk of bias across studies (see Item 15).                                                                                                                          | Page 9, Paragraph 1                               |
| Additional analysis           | 23 | Give results of additional analyses, if done (e.g., sensitivity or subgroup analyses, meta-regression [see Item 16]).                                                                                    | Page 10, Paragraph 1<br>Page 11, Paragraph 2      |
| <b>DISCUSSION</b>             |    |                                                                                                                                                                                                          |                                                   |
| Summary of evidence           | 24 | Summarize the main findings including the strength of evidence for each main outcome; consider their relevance to key groups (e.g., healthcare providers, users, and policy makers).                     | Page 12, paragraph 1, 2;<br>Page 13, paragraph 1  |
| Limitations                   | 25 | Discuss limitations at study and outcome level (e.g., risk of bias), and at review-level (e.g., incomplete retrieval of identified research, reporting bias).                                            | Page 14, paragraph 1, 2                           |
| Conclusions                   | 26 | Provide a general interpretation of the results in the context of other evidence, and implications for future research.                                                                                  | Page 14, paragraph 3                              |
| <b>FUNDING</b>                |    |                                                                                                                                                                                                          |                                                   |
| Funding                       | 27 | Describe sources of funding for the systematic review and other support (e.g., supply of data); role of funders for the systematic review.                                                               | Page 15, paragraph 1                              |

*From:* Moher D, Liberati A, Tetzlaff J, Altman DG, The PRISMA Group (2009). Preferred Reporting Items for Systematic Reviews and Meta-Analyses: The PRISMA Statement. PLoS Med 6(6): e1000097. doi:10.1371/journal.pmed1000097

## S2 Inclusion exclusion criteria for all trials

| Author/Year                 | Inclusion criteria                                                                    | Exclusion criteria                                                                                                                                                                                                                                                                                                                      | Primary Outcomes                                                                                                                                  | Other Outcomes Studied                                      |
|-----------------------------|---------------------------------------------------------------------------------------|-----------------------------------------------------------------------------------------------------------------------------------------------------------------------------------------------------------------------------------------------------------------------------------------------------------------------------------------|---------------------------------------------------------------------------------------------------------------------------------------------------|-------------------------------------------------------------|
| Parrillo <sup>1</sup> /1989 | Dilated cardiomyopathy                                                                | Coronary, hypertensive, valvular, or congenital heart disease<br>Excessive alcohol ingestion<br>Unrelated serious injury                                                                                                                                                                                                                | Improvement in LV function defined as $\geq 5\%$ increase in LVEF, OR $\geq 10\%$ decrease in LVEDD and $\geq 20\%$ increase in exercise duration | Not recorded                                                |
| Sliwa <sup>2</sup> /1998    | Age 18-70 year<br>Stable NYHA II /III<br>CHF of unknown aetiology<br>LVEF $\leq 40\%$ | COPD<br>Significant valvular heart disease<br>Evidence ischemic heart disease<br>SBP >170 mm Hg<br>DBP >105 mm Hg<br>Disorders other than cardiomyopathy that could increase TNF- $\alpha$ concentrations<br>Pregnancy<br>Severe liver disease<br>Any clinical condition judged by the investigators to preclude inclusion in the study | NYHA functional class<br>Left-ventricular dimensions<br>Left-ventricular systolic and diastolic function                                          | Not recorded                                                |
| Deswal <sup>3</sup> /1999   | LVEF <35%<br>NYHA III<br>TNF >3.0 pg/mL                                               | Not recorded                                                                                                                                                                                                                                                                                                                            | Safety of etanercept in patients with NYHA class III heart failure<br>improvement in LVEF, patient functional status, and TNF bioactivity         | Pharmacokinetics of a single intravenous dose of etanercept |

|                                   |                                                                                                                                                                                        |                                                                                                                                                                                                                                                                                                                              |                                                                                            |                                                                                                                                                                |
|-----------------------------------|----------------------------------------------------------------------------------------------------------------------------------------------------------------------------------------|------------------------------------------------------------------------------------------------------------------------------------------------------------------------------------------------------------------------------------------------------------------------------------------------------------------------------|--------------------------------------------------------------------------------------------|----------------------------------------------------------------------------------------------------------------------------------------------------------------|
| <p>Gullestad<sup>4</sup>/2001</p> | <p>CHF &gt;6 months<br/>NYHA II/III<br/>LVEF &lt;40%<br/>No changes in medication in the past 3 months<br/>On optimal medical therapy<br/>And unsuitable for surgical intervention</p> | <p>Myocardial infarction/ Unstable angina in last 6 months<br/>Significant concomitant diseases such as infections, pulmonary disorders or connective tissue diseases.</p>                                                                                                                                                   | <p>Effect of IVIG on inflammatory and anti-inflammatory mediators in CHF patients</p>      | <p>Change in clinical and hemodynamic variables, including LVEF</p>                                                                                            |
| <p>McNamara<sup>5</sup>/2001</p>  | <p>LVEF ≤40%<br/>DCM or myocarditis<br/>≤6 months of cardiac symptoms at time of randomization</p>                                                                                     | <p>Coronary artery disease<br/>Significant valvular disease<br/>Significant diabetes (therapy of insulin or an oral agent for more than 1 year)<br/>Significant hypertension (SBP&gt;160 mmHg or DBP&gt;95 mmHg)<br/>Uncorrected thyroid disease<br/>Evidence of giant cell myocarditis, sarcoidosis, or hemochromatosis</p> | <p>Change in LVEF from baseline to 6 and 12 months</p>                                     | <p>Event-free survival (death, cardiac transplantation, or placement of an LVAD)<br/>Functional capacity assessed by metabolic stress testing at 12 months</p> |
| <p>Skudicky<sup>6</sup>/2001</p>  | <p>Age 18-70<br/>NYHA II/III CHF of unknown cause<br/>LVEF &lt;40%<br/>sinus rhythm<br/>ability to obtain high-quality echocardiographic images</p>                                    | <p>COPD<br/>Significant valvular heart disease<br/>History or evidence of ischemic heart disease<br/>SBP &gt;160 mm Hg<br/>DBP &gt;95 mm Hg<br/>Clinical conditions other than cardiomyopathy that could increase cytokine levels<br/>Pregnancy<br/>Severe liver disease (enzymes &gt;2 times the upper limit of normal)</p> | <p>NYHA functional class<br/>Exercise tolerance<br/>LV systolic and diastolic function</p> | <p>Not recorded</p>                                                                                                                                            |

|                            |                                                                                                                                                                    |                                                                                                                                                                                                                                                                    |                                                                             |                                                                                                                      |
|----------------------------|--------------------------------------------------------------------------------------------------------------------------------------------------------------------|--------------------------------------------------------------------------------------------------------------------------------------------------------------------------------------------------------------------------------------------------------------------|-----------------------------------------------------------------------------|----------------------------------------------------------------------------------------------------------------------|
|                            |                                                                                                                                                                    | Any clinical condition that according to the investigators precluded inclusion in the study                                                                                                                                                                        |                                                                             |                                                                                                                      |
| Bozkurt <sup>7</sup> /2001 | NYHA III/IV<br>LVEF <35%, On stable doses of ACE inhibitor, digoxin, and oral diuretics for 30 days before enrollment<br>Able to walk ≥100 m in 6 minute walk test | Not recorded                                                                                                                                                                                                                                                       | Safety and tolerability of etanercept                                       | Improvement in LV function and structure<br>Functional and clinical status as measured by a clinical composite score |
| Wojnicz <sup>8</sup> /2001 | Heart failure ≥6 months<br>LVEF ≤40%                                                                                                                               | No increased expression of HLA molecules in biopsy<br>Systolic heart failure for <6 months<br>All known causes of heart failure ruled out, endocrine disease, significant renal disease, drug or alcohol abuse<br>Steroid therapy within 6 months before the study | Cardiac death, heart transplantation, and readmission to the hospital       | Change in EF, EDD, EDV, and ESV and NYHA class                                                                       |
| Sliwa <sup>9</sup> /2002   | Age ≥18 years<br>NYHA IV<br>LVEF ≤40%<br>LVEDD >55 mm<br>Sinus rhythm<br>On dobutamine ≥ 72 hours<br>High-quality echocardiographic images could be obtained       | Coronary artery disease<br>Pulmonary disease<br>Organic valvular disease<br>Conditions other than heart failure known to increase plasma cytokine concentrations<br>Received anti-inflammatory agents                                                              | Effect on pump performance<br>Plasma TNF, Fas/Apo-1 and IL-10 concentration | Effect on functional class, hemodynamics (BP, HR, LVEF), and cardiac dimensions (LVEDD and LVESD)                    |
| Chung <sup>10</sup> /2003  | Age ≥18 years<br>Stable NYHA III/IV                                                                                                                                | Hemodynamically significant obstructive valvular disease                                                                                                                                                                                                           | Change in composite clinical score at 14                                    | Change in inflammatory markers during the 28-                                                                        |



|                                 |                                                                                                                                                            |                                                                                                                                                                                                                                                                                                                 |                |                                                                                                                                                                                                              |
|---------------------------------|------------------------------------------------------------------------------------------------------------------------------------------------------------|-----------------------------------------------------------------------------------------------------------------------------------------------------------------------------------------------------------------------------------------------------------------------------------------------------------------|----------------|--------------------------------------------------------------------------------------------------------------------------------------------------------------------------------------------------------------|
|                                 | LVEF $\leq$ 35%                                                                                                                                            | Cor pulmonale<br>Restrictive or hypertrophic cardiomyopathy<br>Constrictive pericarditis<br>Congenital heart disease<br>Experienced an acute myocardial infarction or coronary revascularization procedure within 2 months<br>Likely to undergo coronary revascularization or heart transplant during the study | weeks          | week trial period<br>Change in LVEF at 14 and 28 weeks<br>risk of death or hospitalization for worsening heart failure at 28 weeks<br>Change in Minnesota Living With Heart Failure score at 14 and 28 weeks |
| Bahrman <sup>11</sup> /<br>2004 | Age 18-70<br>Stable NYHA II/III HF due to ischemic and hypertensive cardiomyopathy or idiopathic-dilated cardiomyopathy<br>LVEF $\leq$ 40%<br>Sinus rhythm | COPD<br>Significant valvular disease<br>Disorders other than cardiomyopathy that could increase TNF- $\alpha$ and IL-6 concentrations<br>Pregnancy<br>Severe liver disease<br>Acute MI<br>Hemorrhage<br>Any clinical condition judged by the investigators to prevent inclusion in the study                    | Change in LVEF | Concentrations of TNF- $\alpha$ , IL-6, BNP, and VO <sub>2</sub> max<br>Minnesota Living with Heart Failure Questionnaire<br>NYHA class                                                                      |
| Sliwa <sup>12</sup> /2004       | Age 18-70<br>NYHA II/III<br>LVEF <40%<br>Sinus rhythm<br>Ability to obtain high-quality echocardiographic images                                           | Clinical conditions other than cardiomyopathy that could influence cytokine levels<br>Pregnancy<br>Severe exercise-induced malignant ventricular arrhythmia<br>MI within the last 12 months<br>Recent myocardial                                                                                                | Change in LVEF | Not recorded                                                                                                                                                                                                 |

|                                  |                                                                                                                                                                                                        |                                                                                                                                                                                                        |                                                                |                                                                                                                                                                                             |
|----------------------------------|--------------------------------------------------------------------------------------------------------------------------------------------------------------------------------------------------------|--------------------------------------------------------------------------------------------------------------------------------------------------------------------------------------------------------|----------------------------------------------------------------|---------------------------------------------------------------------------------------------------------------------------------------------------------------------------------------------|
|                                  |                                                                                                                                                                                                        | revascularization (<6 months)<br>Any clinical condition that according to the investigators precluded inclusion into the study                                                                         |                                                                |                                                                                                                                                                                             |
| Torre-Amione <sup>13</sup> /2005 | Age ≥18<br>NYHA III/IV LVEF <40%<br>6-minute walk distance >300m<br>On standard medical treatment<br>No change in active cardiac medications 2 weeks before enrollment                                 | Not recorded                                                                                                                                                                                           | Change 6 minute walk distance<br>Change in NYHA classification | Change in cardiac function<br>All-cause mortality<br>All-cause Hospitalization<br>Change in the Minnesota Living With Heart Failure score                                                   |
| Gullestad <sup>14</sup> /2005    | NYHA II/III<br>LVEF <40%<br>No changes in medication during the last 3 months<br>Clinically and hemodynamically stable<br>Optimally treated with medications<br>No possibility of surgical improvement | Evidence of acute coronary syndromes during the last 6 months<br>Significant concomitant disease<br>Abnormal liver function test results<br>Women of child-bearing potential<br>Any form of neuropathy | Change in LVEF                                                 | Change in LVEDV, NYHA class<br>HR, BP<br>Minnesota Living With Heart Failure<br>Questionnaire and McMaster Overall Treatment Evaluation questionnaire<br>NT-proBNP<br>Immunologic variables |
| Gong <sup>15</sup> /2006         | Age 18-75 years<br>NYHA II-IV<br>High-quality echocardiographic images could be obtained<br>LVEF <45% and LVEDD >55 mm                                                                                 | COPD, rheumatoid arthritis, infection, connective tissue disease, neoplasm, severe liver or renal dysfunction, Anemia, Acute MI within 6 weeks, Unstable angina pectoris                               | Change in concentration of inflammatory cytokines              | LVEDD<br>LVEF<br>NYHA class<br>6MWT<br>Quality OF Life<br>Physical and mental health score                                                                                                  |

|                               |                                                                                                                                                                                                                                                |                                                                                                                                                                                                                                                                                                                                                                                                                                                                                                                                                               |                      |                                                                                                                               |
|-------------------------------|------------------------------------------------------------------------------------------------------------------------------------------------------------------------------------------------------------------------------------------------|---------------------------------------------------------------------------------------------------------------------------------------------------------------------------------------------------------------------------------------------------------------------------------------------------------------------------------------------------------------------------------------------------------------------------------------------------------------------------------------------------------------------------------------------------------------|----------------------|-------------------------------------------------------------------------------------------------------------------------------|
| Frustaci <sup>16</sup> /2009  | LVEF <45%<br>Age 18-75<br>CHF >6 months<br>Histologic and immunohistochemical evidence of active lymphocytic myocarditis<br>Absence of cardiotropic viruses at PCR analysis<br>Absence of congenital, valvular, and/or coronary artery disease | CHF <6 months<br>Known causes of heart failure<br>Steroid therapy within 6 months before enrollment<br>Contraindication to treatment with steroids or azathioprine<br>Pregnancy or lactation                                                                                                                                                                                                                                                                                                                                                                  | Change in LVEF       | Changes LV volumes and diameters<br>Changes in heart failure symptoms<br>NYHA class<br>cardiac death or heart transplantation |
| Deftereos <sup>17</sup> /2014 | Stable symptomatic heart failure<br>LVEF ≤40%                                                                                                                                                                                                  | Recently hospitalized patients (≤3 months)<br>NYHA IV<br>Recent (≤ 6 months) implantation of a cardiac resynchronization treatment device<br>Active inflammatory/infectious disease or malignancy<br>Known autoimmune diseases, corticosteroid or other immunosuppressive or immunomodulatory therapy<br>moderate or severe hepatic impairment<br>severe renal failure (glomerular filtration rate <30 ml/min/1.73 m <sup>2</sup> )<br>Current participation in another research protocol<br>Inability or unwillingness to adhere to standard treatment or to | Change in NYHA class | The composite of death and hospital stay for CHF<br>Change in LVEDD<br>Change in LVEF<br>Change in treadmill exercise time    |

|                                    |                                                                                                                                                                                                                                                                                                                                                                                                                                                                                                                                           |                                                                                                                                                                                                                                                                                                                                                                                                                                                                                                                                                                                                                                                                                                                                                                                                                                                                                                                                                                                                             |               |                                                                                                                                                          |
|------------------------------------|-------------------------------------------------------------------------------------------------------------------------------------------------------------------------------------------------------------------------------------------------------------------------------------------------------------------------------------------------------------------------------------------------------------------------------------------------------------------------------------------------------------------------------------------|-------------------------------------------------------------------------------------------------------------------------------------------------------------------------------------------------------------------------------------------------------------------------------------------------------------------------------------------------------------------------------------------------------------------------------------------------------------------------------------------------------------------------------------------------------------------------------------------------------------------------------------------------------------------------------------------------------------------------------------------------------------------------------------------------------------------------------------------------------------------------------------------------------------------------------------------------------------------------------------------------------------|---------------|----------------------------------------------------------------------------------------------------------------------------------------------------------|
|                                    |                                                                                                                                                                                                                                                                                                                                                                                                                                                                                                                                           | provide consent                                                                                                                                                                                                                                                                                                                                                                                                                                                                                                                                                                                                                                                                                                                                                                                                                                                                                                                                                                                             |               |                                                                                                                                                          |
| Van Tessel <sup>18</sup> /<br>2016 | Acute decompensated heart failure within the last 24 hours as evidenced by dyspnea at rest and evidence of elevated cardiac filling pressure (or pulmonary congestion) as evidenced by pulmonary congestion/edema at physical exam (or chest radiography), BNP $\geq$ 200 pg/mL, or invasive measure of LVEDP $>$ 18 mmHg or PCWP $>$ 16 mmHg;<br>LVEF $<$ 40% during index hospitalization or prior 12 months;<br>Age $\geq$ 18 years old;<br>Willing and able to provide written informed consent;<br>C-reactive protein $\geq$ 5 mg/L. | Admission for something other than decompensated heart failure, including diagnosis of acute coronary syndromes, hypertensive urgency/emergency, tachy- or brady-arrhythmias; acute coronary syndromes, uncontrolled hypertension or orthostatic hypotension, tachy- or brady-arrhythmias, acute or chronic pulmonary disease or neuromuscular disorders affecting respiration; recent (previous 3 months) or planned cardiac resynchronization therapy (CRT), coronary artery revascularization procedures, or heart valve surgeries; Previous or planned implantation of LVAD or heart-transplant; Chronic use of intravenous inotropes; Recent ( $<$ 14 days) use of immunosuppressive or anti-inflammatory drugs (not including NSAIDs); Chronic inflammatory disorder Active infection (of any type); Chronic/recurrent infectious disease (including HBV, HCV, and HIV/AIDS); Prior ( $\leq$ 10 years) or current malignancy; Any comorbidity limiting survival or ability to complete the study; End | Change in CRP | Change in cardiac structure and function<br>Clinical outcomes: such as adverse events, length of hospital stay, hospital readmission and time-to-events. |

|                                  |                                        |                                                                                                                                                                                                                                                       |                                                                                                                                                                            |  |
|----------------------------------|----------------------------------------|-------------------------------------------------------------------------------------------------------------------------------------------------------------------------------------------------------------------------------------------------------|----------------------------------------------------------------------------------------------------------------------------------------------------------------------------|--|
|                                  |                                        | stage kidney disease requiring renal replacement therapy; Neutropenia (<2,000/mm <sup>3</sup> ) or Thrombocytopenia (<50,000/mm <sup>3</sup> ); Pregnancy                                                                                             |                                                                                                                                                                            |  |
| Xiaojing <sup>19</sup> /<br>2017 | Primary CHF<br>NYHA II–IV<br>LVEF ≤40% | Presence of a tumor<br>Acute or chronic infection<br>Immune system disease<br>Recent major surgery or trauma (within 6 months)<br>Rheumatoid activity<br>Acute cerebrovascular disease (within 6 months)<br>Liver, kidney, or pulmonary insufficiency | Change in LVEF, LVEDD, LVESD<br>hsCRP, BNP,<br>6-min walking distance<br>Minnesota Living with Heart Failure Questionnaire<br>Lymphocyte subsets<br>Inflammatory cytokines |  |

EF, Ejection fraction; ICM, Ischemic cardiomyopathy; IVIg, Intra-Venous Immunoglobulin; kg, kilogram; LVEDD, Left ventricular end-diastolic dimension; LVEF: Left ventricular ejection fraction; LVESD: Left ventricular end-systolic dimension; hsCRP: high sensitivity C-Reactive Protein; BNP: Brain natriuretic peptide; NYHA: New York Heart Association; TNF: Tumor necrosis factor; CHF: Congestive heart failure; HIV: Human immune-deficiency virus; AIDS: Acquired immune-deficiency syndrome; LVAD: Left ventricle assist device; HBV: Hepatitis B virus; HCV: Hepatitis C virus; PCWP: Pulmonary capillary wedge pressure; BP: blood pressure; HR: Heart rate; 6MWT: 6-minute walk test; COPD: Chronic obstructive pulmonary disease

### **S3 Search Strategy and data collection**

A systematic MEDLINE, Embase<sup>®</sup>, Cochrane Central and ClinicalTrials.gov search was performed from 1980 to March 14, 2019 using human subjects and clinical trials as search filters and various combinations of the following search terms:

#### **PubMed (n=437)**

(Heart Failure OR Ischemic Heart Disease) AND (Infliximab OR Tocilizumab OR Canakinumab OR Anakinra OR Allopurinol OR Oxypurinol OR Xanthine Oxidase inhibitor OR Etanercept OR Pentoxifylline)

(Dilated Cardiomyopathy OR Congestive Heart Failure OR Chronic Heart Failure OR ischemic heart disease) AND (Corticosteroids OR Hydrocortisone OR Dexamethasone OR prednisone OR methylprednisolone OR prednisolone OR IVIg OR Immunoglobulin OR Cyclosporine OR Colchicine OR Celecade OR Methotrexate OR Istaroxime OR Leukoarrest OR Mast cells) AND (ejection fraction)

#### **EMBASE (n=193)**

'heart failure' AND ('anticytokine therapy' OR 'immunosuppression'/exp OR 'immunosuppression' OR 'methotrexate'/exp OR 'methotrexate' OR 'prednisone'/exp OR 'prednisone' OR 'thymopentin'/exp OR 'thymopentin' OR 'ivig'/exp OR 'ivig' OR 'cyclosporine'/exp OR 'cyclosporine' OR 'colchicine' OR 'celacade'/exp OR 'celacade' OR 'innate immunity'/exp OR 'innate immunity' OR 'mast cells'/exp OR 'mast cells' OR 'cd11' OR 'cd18'/exp OR 'cd18' OR 'istaroxime'/exp OR 'istaroxime') AND 'randomized controlled trial'/de AND ('congestive heart failure'/de OR 'heart failure'/de) AND 'drug therapy'/lnk AND ([adult]/lim OR [aged]/lim OR [middle aged]/lim OR [very elderly]/lim)

#### **ClinicalTrials.gov (n=55)**

"Heart Failure" AND ("Cytokines" OR "Corticosteroids" OR "Thymopentin" OR "IVIG" OR "Immunoglobulin" OR "Methotrexate" OR "Colchicine" OR "Celacade" OR "Cyclosporine" OR "Leukoarrest" OR "rhuMab" OR "istaroxime")

#### **Cochrane CENTRAL (n=0)**

("Dilated Cardiomyopathy" OR "Congestive Heart Failure" OR "Chronic Heart Failure" OR "ischemic heart disease") AND ("Corticosteroids" OR "Hydrocortisone" OR "Dexamethasone" OR "prednisone" OR "methylprednisolone" OR "prednisolone" OR "IVIg" OR "Immunoglobulin" OR "Cyclosporine" OR "Colchicine" OR "Celecade" OR "Methotrexate" OR "Istaroxime" OR "Leukoarrest" OR "Mast cells") AND ("ejection fraction")

In addition, references from review articles were screened for eligibility. Only English language studies were considered. Two investigators (K.G and N.J.G) independently conducted the search, reviewed the articles and extracted relevant data from the studies. Disagreements, if any, were resolved through consensus or discussion with the lead investigators (N.S.B and S.D.P).

Data items pertaining to patients' demographic, clinical and treatment characteristics, methods of LVEF and LV end-diastolic dimension (LVEDD) assessment, and all-cause mortality were extracted from the eligible studies. The LVEF (%) and LVEDD (in mm) were reported to one decimal place given spatial resolution and convention for reporting these measures.

## S4 Statistics

### Meta-analysis and publication bias

Data were analyzed for heterogeneity using the  $I^2$  statistic proposed by Higgins and Thompson;<sup>20</sup> 95% confidence intervals (CIs) around the  $I^2$  statistic were also estimated. We intended to assess small study treatment effects using funnel plot techniques and the Begg and Mazumdar correlation.<sup>21,22,23</sup> RoB for the primary efficacy outcome was determined for each trial.<sup>24</sup>

Mean change in LVEF after treatment in both groups was compared. If the mean LVEF for a group was not given, the median was substituted. In the case of multiple intervention groups, data were combined to allow pair-wise comparison (Cochrane Handbook 16.5.4). Mean and standard deviation (SD) of the combined group was calculated using the following formula (Cochrane Table 7.7a).

$$\text{Combined Mean} = \frac{N_1M_1 + N_2M_2}{N_1 + N_2}$$

$$\text{Combined SD} = \sqrt{\frac{(N_1 - 1)SD_1^2 + (N_2 - 1)SD_2^2 + \frac{N_1N_2}{N_1 + N_2}(M_1^2 + M_2^2 - 2M_1M_2)}{N_1 + N_2 - 1}}$$

where  $N_1$  and  $N_2$ ,  $M_1$  and  $M_2$ ,  $SD_1$  and  $SD_2$  is the sample size, the mean and standard deviation of group 1 and 2, respectively.

SD for the mean change in LVEF in each arm was calculated using the formula:

$$SD_{change} = \sqrt{SD_{baseline}^2 + SD_{final}^2 - (2 * Corr * SD_{baseline} * SD_{final})} \text{ (Cochrane 16.1.3.2),}$$

where  $SD_{baseline}$  and  $SD_{final}$  are the standard deviations at the baseline and after the intervention, respectively. The correlation coefficient used was 0.5 (as recommended by the Cochrane manual).



The standard error (SE) was converted to SD using the formula  $SD = \sqrt{N} * SE$  (Cochrane, 7.7.3.3). Inter-quartile range (IQR) was converted to SD using the formula  $SD = IQR/1.35$  (Cochrane 7.7.3.5). In some cases, no variability estimate was provided for either a pre- or post-treatment measurement. SD for groups unable to be found by collecting SD info or calculating it through other means they gave (eg IQR or SE) were assumed to be the same as the pre/post-treatment group as per Cochrane recommendations (Cochrane 16.1.3.2). Summary estimates of SMDs were calculated using the Mantel–Haenszel random effect model.

### **Trial sequential analysis**

Most meta-analyses lack sufficient statistical power to detect treatment effects even when they are large.<sup>25</sup> When the number of included participants or trials is low, traditional meta-analytic techniques and statistical significance thresholds may lead to false-positive (type I errors) or false-negative conclusions (type II errors). In these situations, the Lan-DeMets trial sequential monitoring boundaries in trial sequential analysis offer adjusted confidence intervals when the required information size and the corresponding number of required trials for the meta-analysis have not been reached. The trial sequential analysis (TSA) provides a frequentist approach to control both types I and type II errors. Several empirical studies have demonstrated that TSA provides better control of type I errors and of type II errors than traditional naïve meta-analysis.<sup>25,26</sup> Cumulative meta-analyses were performed in accordance with the study by Lau *et al.*<sup>27</sup>

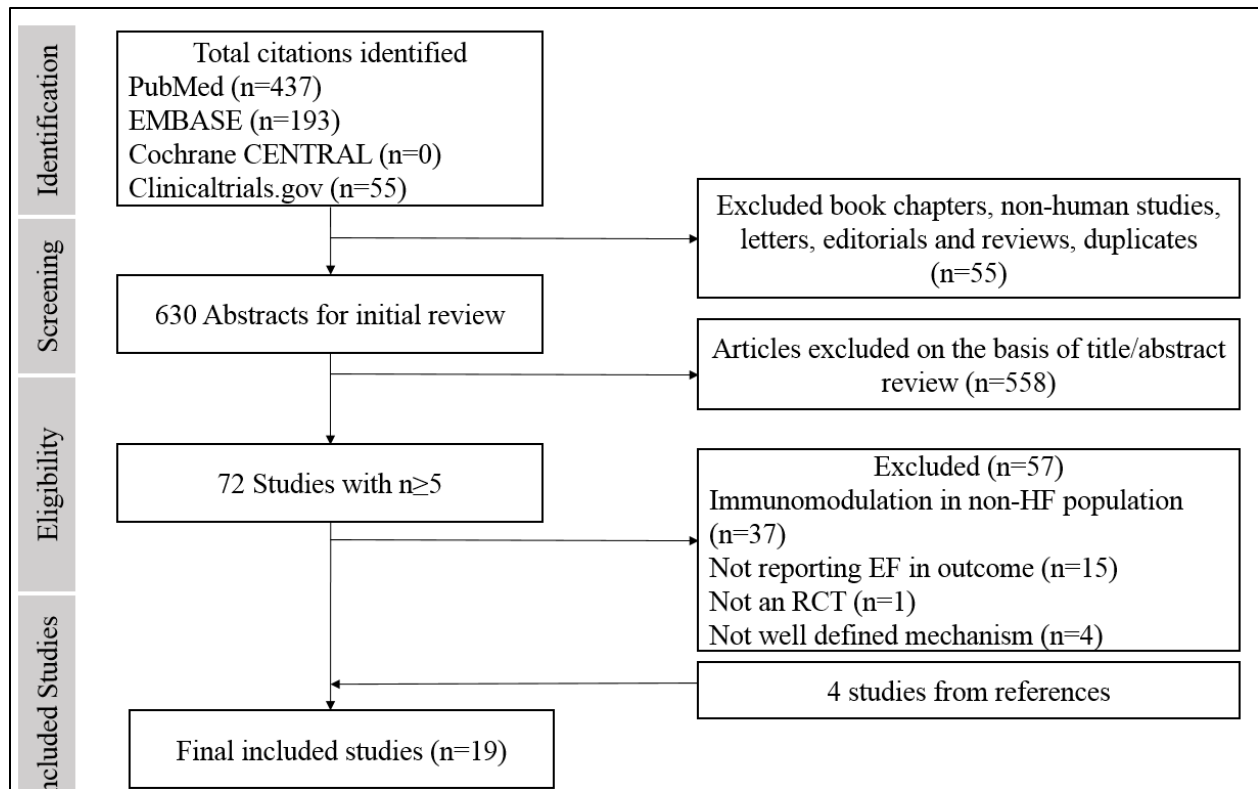

**S5 Supplement Figure 1: Flow diagram for study selection**

**S6 Supplement Table 2:** Treatment protocols and method of LVEF assessment across trials

| <b>Author Year</b>                     | <b>Treatment protocol</b>                                                                                                                                           | <b>Method of LVEF assessment</b> |
|----------------------------------------|---------------------------------------------------------------------------------------------------------------------------------------------------------------------|----------------------------------|
| <b>Parrillo<sup>1</sup>/1989</b>       | T. Prednisone 60 mg QD for 3 months                                                                                                                                 | Radionuclide Imaging             |
| <b>Sliwa<sup>2</sup>/1998</b>          | T. Pentoxifylline 400 mg TID for 6 months                                                                                                                           | Radionuclide Imaging             |
| <b>Deswal<sup>3</sup>/1999</b>         | Inj. Etanercept 1, 4 or 10 mg/m <sup>2</sup> subcutaneous single dose                                                                                               | Echocardiography                 |
| <b>Gullestad<sup>4</sup>/2001</b>      | Inj. IVIg 0.4 g/kg for 5 days f/b by 0.4 g/kg once monthly for 5 months                                                                                             | Radionuclide Imaging             |
| <b>McNamara<sup>5</sup>/ 2001</b>      | Inj. IVIg 1 g/kg intravenous infusion for 2 days                                                                                                                    | Radionuclide Imaging             |
| <b>Skudicky<sup>6</sup>/2001</b>       | T. Pentoxifylline 400 mg TID for 6 months                                                                                                                           | Radionuclide Imaging             |
| <b>Bozkurt<sup>7</sup>/2001</b>        | Inj. Etanercept 5 or 12 mg/m <sup>2</sup> subcutaneous twice-weekly for 3 months                                                                                    | Echocardiography                 |
| <b>Wojnicz<sup>8</sup>/2001</b>        | Prednisone 1 mg/kg/day for 12 days f/b taper every 5 days by 5 mg/day to a maintenance dose of 0.2 mg/kg/day for total 90 days. Azathioprine 1 mg/kg/d for 100 days | Echocardiography                 |
| <b>Sliwa<sup>9</sup>/2002</b>          | T. Pentoxifylline 400mg TID for 1 month                                                                                                                             | Radionuclide Imaging             |
| <b>Chung<sup>10</sup>/2003</b>         | Inj. Infliximab 5 or 10 mg/kg intravenous infusion at 0, 2, and 6 weeks                                                                                             | Radionuclide Imaging             |
| <b>Bahrman<sup>11</sup>/ 2004</b>      | T. Pentoxifylline 600mg BID for 6 months                                                                                                                            | Echocardiography                 |
| <b>Sliwa<sup>12</sup>/2004</b>         | T. Pentoxifylline 400mg TID for 6 months                                                                                                                            | Radionuclide Imaging             |
| <b>Torre-Amione<sup>13</sup>/ 2005</b> | Inj. Celecade intramuscular for 2 days followed by once monthly for 6 months                                                                                        | Echocardiography                 |
| <b>Gullestad<sup>14</sup>/2005</b>     | T. Thalidomide 25 mg QD doubling every 2 weeks to target dose of 200 mg for 12 weeks                                                                                | Radionuclide Imaging             |
| <b>Gong<sup>15</sup>/2006</b>          | T. Methotrexate 7.5 mg once/week for 12 weeks                                                                                                                       | Echocardiography                 |
| <b>Frustaci<sup>16</sup>/2009</b>      | T. Prednisone 1 mg/kg/day for 4 weeks f/b 0.33 mg/kg/day for 5 months.<br>Azathioprine 2 mg/kg/day for 6 months                                                     | Echocardiography                 |
| <b>Deftereos<sup>17</sup>/ 2014</b>    | T. Colchicine 0.5 mg BID for 6 months                                                                                                                               | Echocardiography                 |
| <b>Van Tessel<sup>18</sup>/ 2016</b>   | Inj. Anakinra 100 mg/day subcutaneous for 2 or 12 weeks                                                                                                             | Echocardiography                 |
| <b>Xiaojing<sup>19</sup>/2017</b>      | Inj. Thymopentin intramuscular 2 mg/dose; once/15 days; total 5 doses                                                                                               | Echocardiography                 |

T, Tablet; Inj, Injection; QD, once daily; TID, three times daily; f/b, followed by; BID, twice daily; mg, milligram; kg, kilogram.

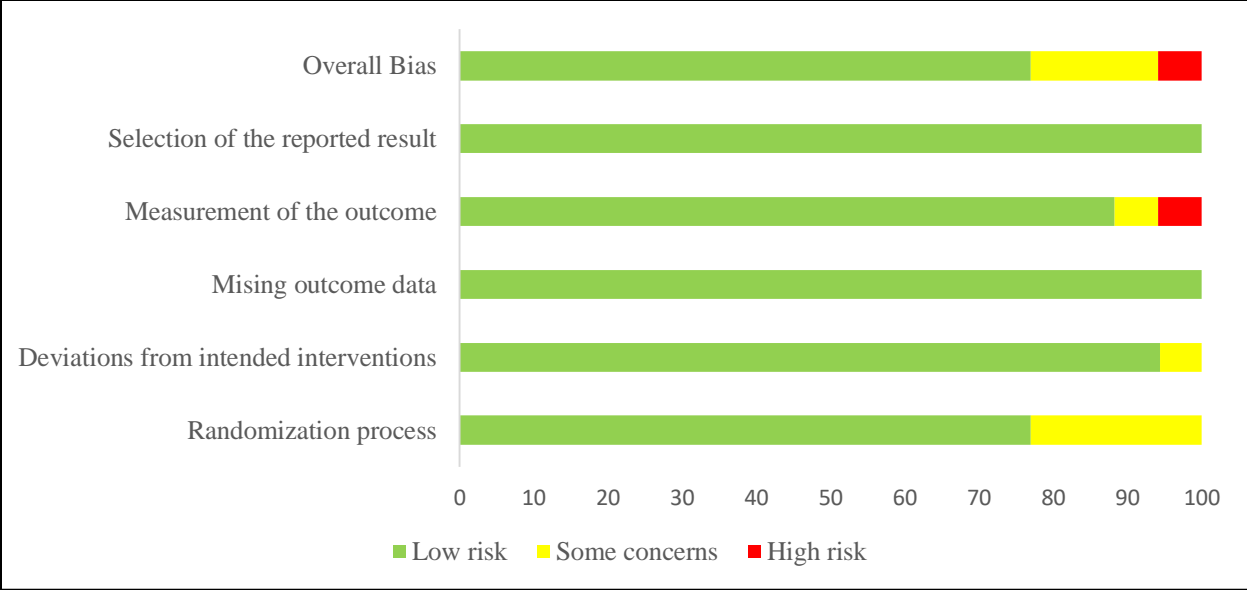

**S7 Supplement Figure 2:** Risk-of-bias summary for randomized trials (RoB 2.0) assessed using the Cochrane RoB tool<sup>28</sup>

| Unique ID       | Randomization process | Deviations from intended interventions | Missing outcome data | Measurement of the outcome | Selection of the reported result | Overall Bias |
|-----------------|-----------------------|----------------------------------------|----------------------|----------------------------|----------------------------------|--------------|
| Parrillo 1989   | ?                     | +                                      | +                    | ?                          | +                                | !            |
| Sliwa 1998      | +                     | +                                      | +                    | +                          | +                                | +            |
| Deswal 1999     | +                     | +                                      | +                    | +                          | +                                | +            |
| Gullestad 2001  | +                     | +                                      | +                    | +                          | +                                | +            |
| McNamara 2001   | +                     | +                                      | +                    | +                          | +                                | +            |
| Skudicky 2001   | +                     | +                                      | +                    | +                          | +                                | +            |
| Bozkurt 2001    | +                     | +                                      | +                    | +                          | +                                | +            |
| Wojnicz 2001    | ?                     | +                                      | +                    | +                          | +                                | !            |
| Sliwa 2002      | +                     | +                                      | +                    | +                          | +                                | +            |
| Chung 2003      | +                     | +                                      | +                    | +                          | +                                | +            |
| Bahrman 2004    | +                     | +                                      | +                    | +                          | +                                | +            |
| Sliwa 2004      | +                     | +                                      | +                    | +                          | +                                | +            |
| Torre 2005      | +                     | +                                      | +                    | +                          | +                                | +            |
| Gullestad 2005  | +                     | +                                      | +                    | +                          | +                                | +            |
| Gong 2006       | ?                     | ?                                      | +                    | +                          | +                                | !            |
| Frustaci 2009   | +                     | +                                      | +                    | +                          | +                                | +            |
| Deftereos 2014  | +                     | +                                      | +                    | +                          | +                                | +            |
| Xiaoqing 2017   | ?                     | +                                      | +                    | -                          | +                                | -            |
| Van Tessel 2017 | +                     | +                                      | +                    | +                          | +                                | +            |

**S8 Supplement Figure 3:** Review author’s judgements about each risk-of-bias for each trial included. Green, yellow and red solid circles represent low, some concern and high risk-of-bias, respectively.

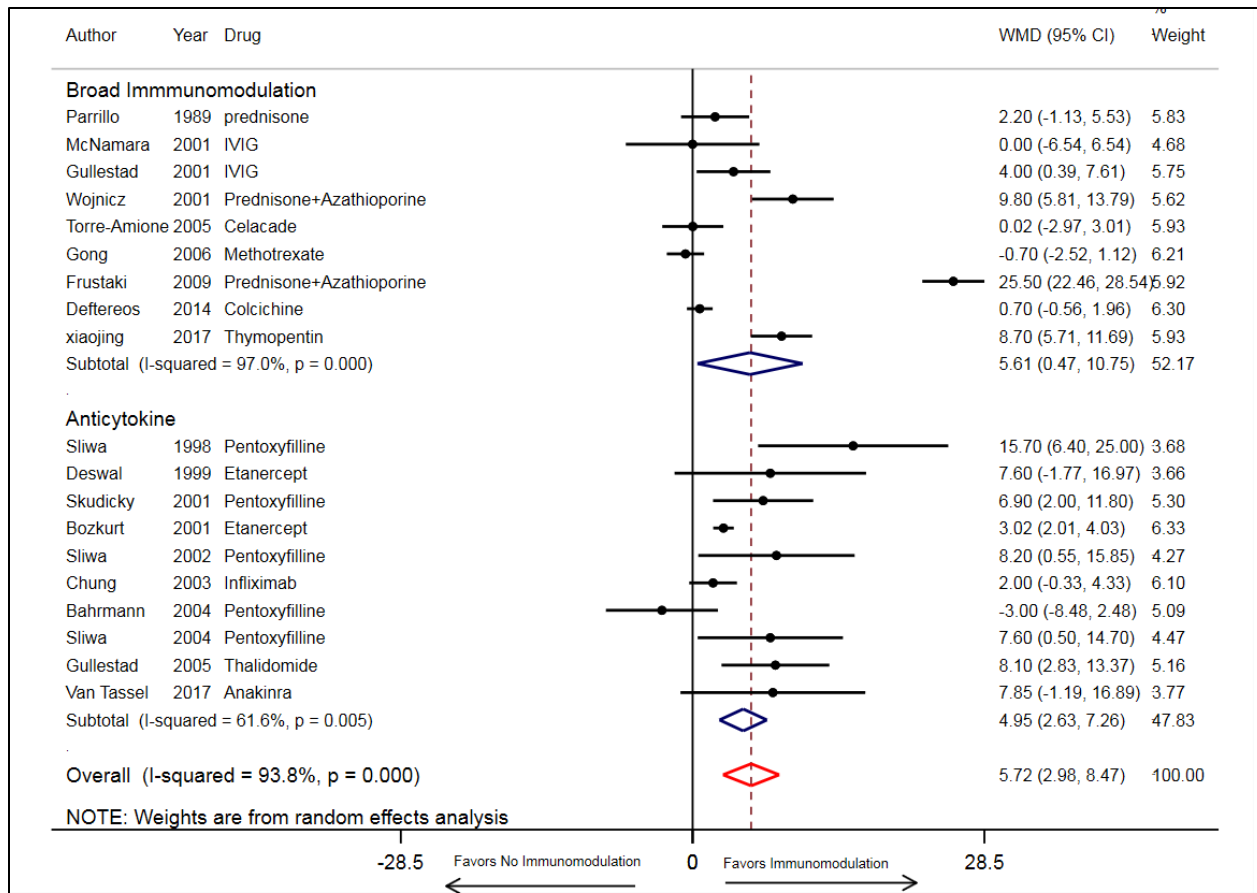

**S9 Supplement Figure 4:** Effect of immunomodulation on LVEF as compared to no immunomodulation according to drug class. Black solid square diamonds and associated solid lines represent summary RR and 95% CI of each trial listed in the left column. The numerical estimates in the right columns are weighted mean difference(s) (WMD) with 95% CI of each trial listed in the left column. The hollow blue diamond is summary WMD and 95% CI for immunomodulation as compared to no immunomodulation. The hollow red diamond is the overall summary WMD with 95% CI. CI: Confidence interval

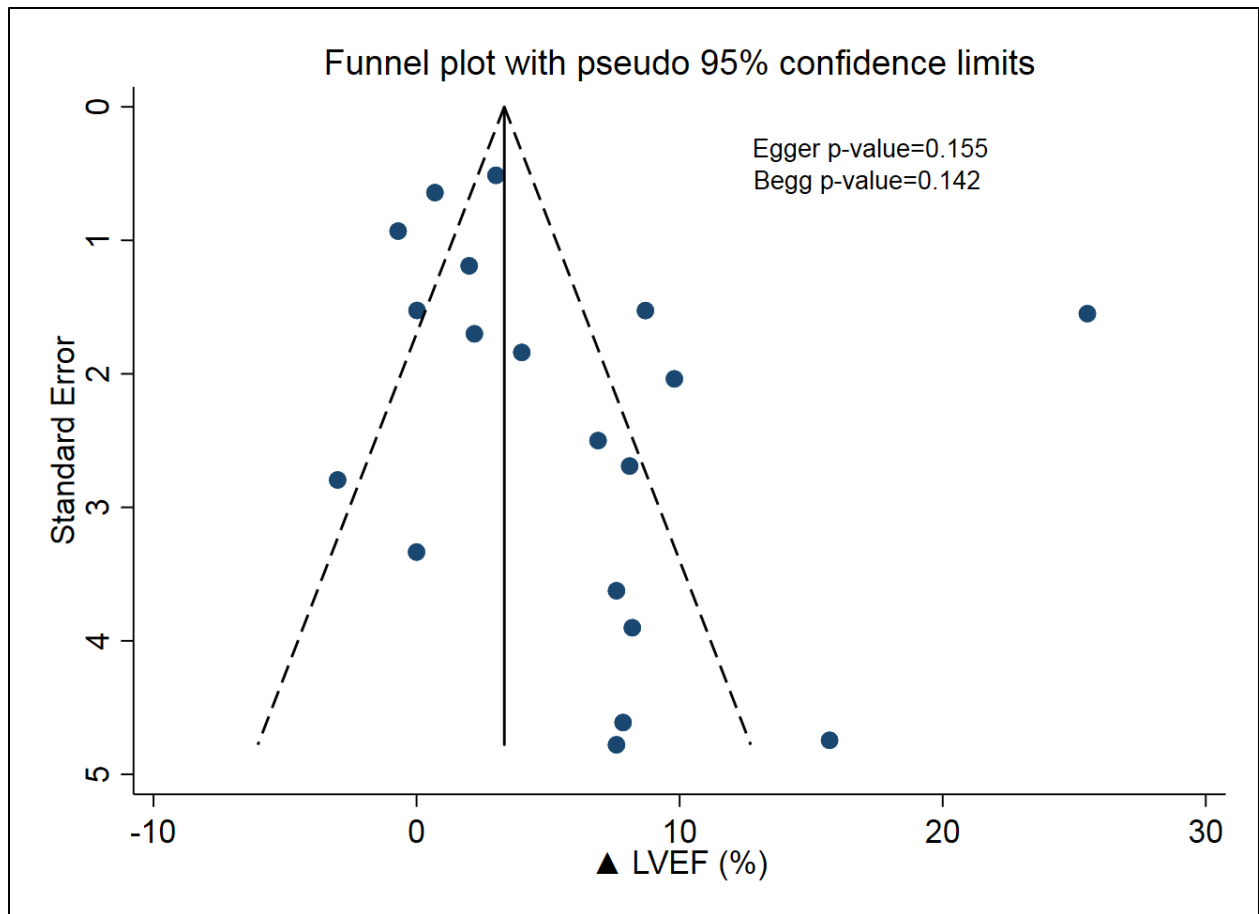

**S10 Supplement Figure 5:** Funnel plot for publication bias with each blue dot representing a randomized trial and the dotted lines representing the pseudo 95% confidence intervals.

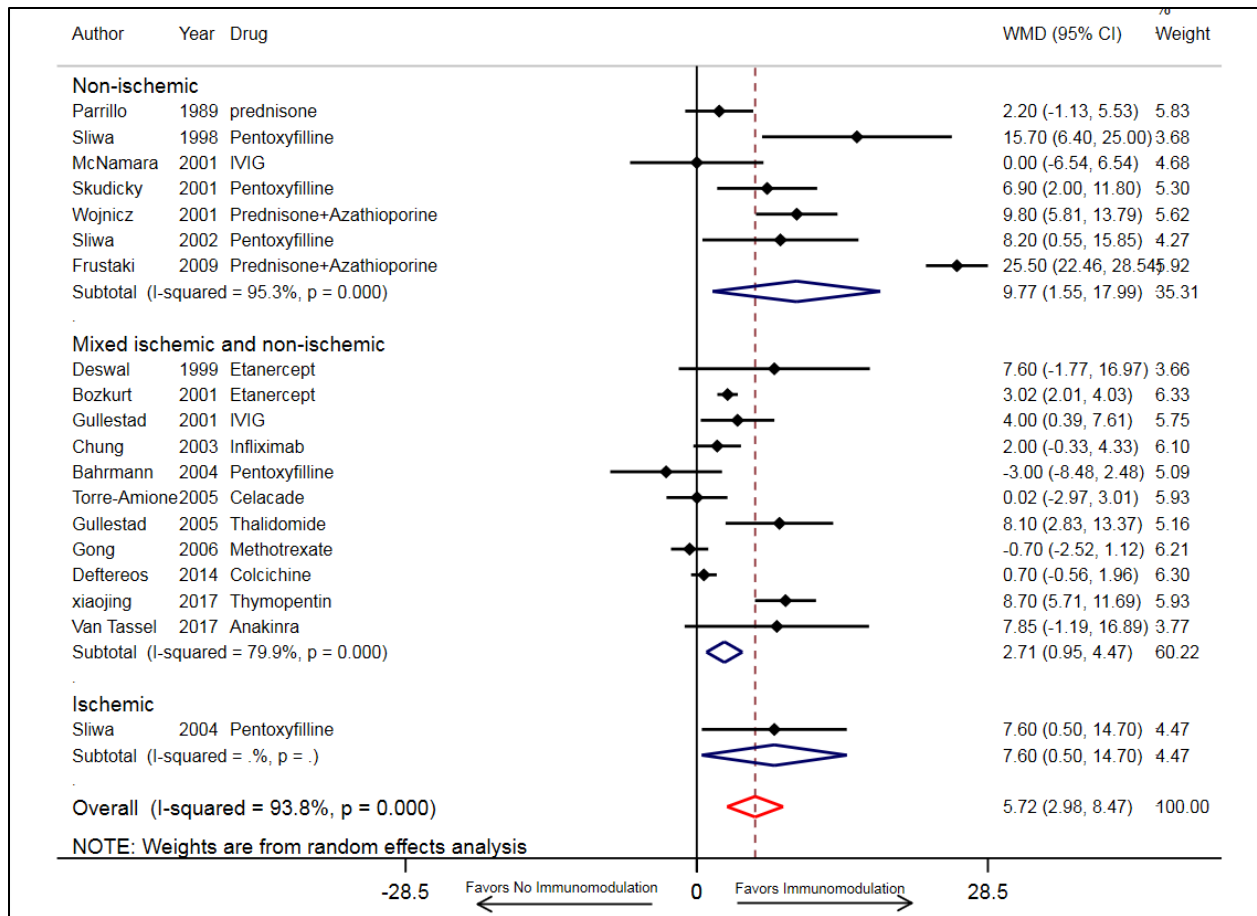

**S11 Supplement Figure 6:** Effect of immunomodulation on LVEF as compared to no immunomodulation according to heart failure aetiology. Black solid square diamonds and associated solid lines represent summary RR and 95% CI of each trial listed in the left column. The numerical estimates in the right columns are weighted mean difference(s) (WMD) with 95% CI of each trial listed in the left column. The hollow blue diamond is summary WMD and 95% CI for immunomodulation as compared to no immunomodulation. The hollow red diamond is the overall summary WMD with 95% CI. CI: Confidence interval



**S12 Supplement Table 3:** Mean difference, weighted (WMD) and standardized (SMD) for primary and secondary outcomes.

| <b>Outcome</b>                                  | <b>WMD</b>         | <b>p-value</b> | <b>SMD</b>        | <b>p-value</b> |
|-------------------------------------------------|--------------------|----------------|-------------------|----------------|
| <b>Left ventricular ejection fraction</b>       |                    |                |                   |                |
| Overall                                         | 5.7 (3.0, 8.5)     | <0.001         | 0.7 (0.4, 1.1)    | <0.001         |
| Drug class                                      |                    |                |                   |                |
| Anticytokine                                    | 5.0 (2.6, 7.3)     | <0.001         | 0.7 (0.4, 1.1)    | 0.032          |
| Broad                                           | 5.6 (0.5, 10.8)    | <0.001         | 0.7 (0.2, 1.3)    | 0.012          |
| Aetiology                                       |                    |                |                   |                |
| Non-Ischemic                                    | 9.8 (1.6, 18.0)    | 0.020          | 1.2 (0.3, 2.0)    | 0.007          |
| Ischemic                                        | 7.6 (0.5, 14.7)    | 0.036          | 0.7 (0, 1.4)      | 0.054          |
| Mixed                                           | 2.7 (1.0, 4.5)     | 0.003          | 0.5 (0.2, 0.8)    | 0.004          |
| <b>Left ventricular end-diastolic dimension</b> |                    |                |                   |                |
| Overall                                         | -3.7 (-7.0, -0.4)  | 0.028          | -0.5 (-0.9, -0.1) | 0.012          |
| Drug class                                      |                    |                |                   |                |
| Anticytokine                                    | -1.6 (-4.2, 1.0)   | 0.231          | -0.2 (-0.5, 1.0)  | 0.238          |
| Broad                                           | -5.2 (-10.0, -0.4) | 0.035          | -0.7 (-1.3, -0.1) | 0.018          |
| Aetiology                                       |                    |                |                   |                |
| Non-Ischemic                                    | -5.2 (-12.5, 2.0)  | 0.156          | -0.7 (-1.5, 0.1)  | 0.093          |
| Ischemic                                        | 0 (-5.6, 5.6)      | 1.0            | 0 (-0.7, 0.7)     | 1.000          |
| Mixed                                           | -3.7 (-7.0, -0.4)  | 0.076          | -0.3 (-0.6, -0.1) | 0.021          |

Data are presented as mean (95% Confidence interval)

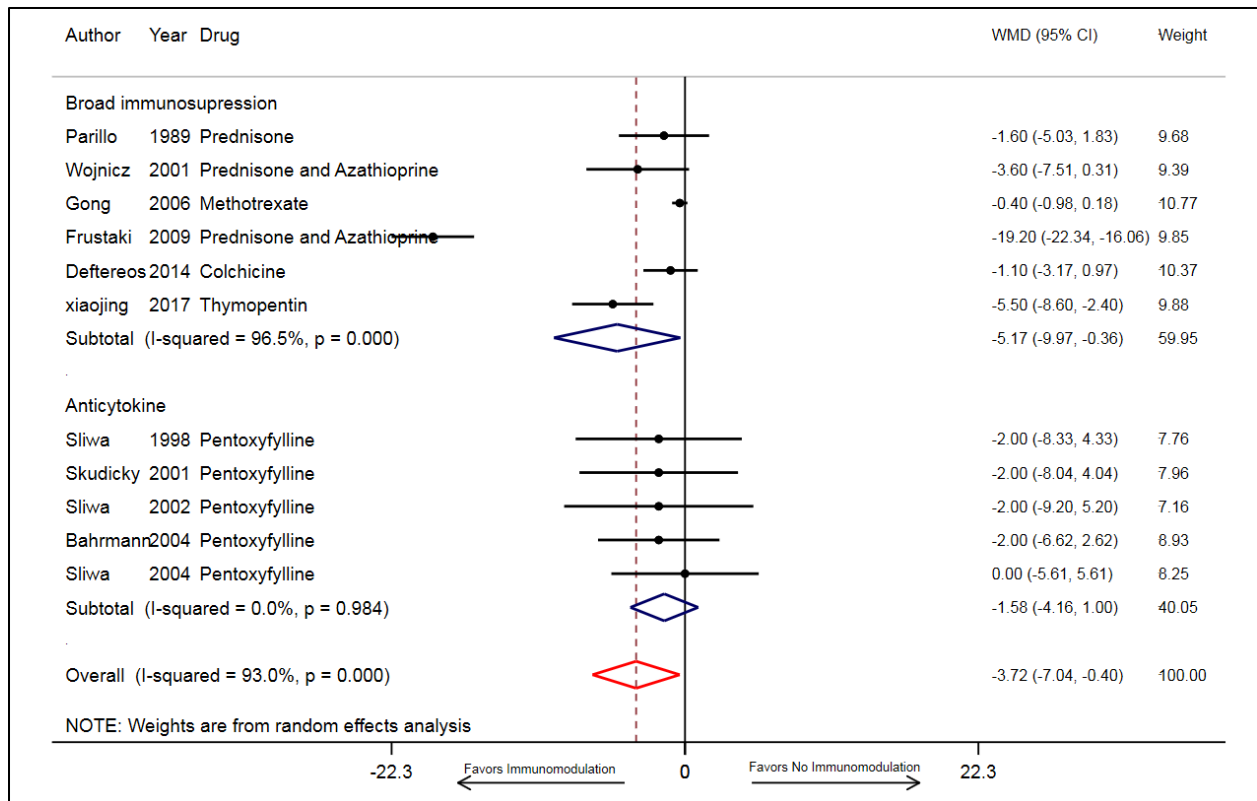

**S13 Supplement Figure 7:** Effect of immunomodulation on LVEDD as compared to no immunomodulation according to drug class. Black solid square diamonds and associated solid lines represent summary RR and 95% CI of each trial listed in the left column. The numerical estimates in the right columns are weighted mean difference(s) (WMD) with 95% CI of each trial listed in the left column. The hollow blue diamond is summary WMD and 95% CI for each class of immunomodulation as compared to no immunomodulation. The hollow red diamond is the overall summary WMD with 95% CI. CI: Confidence interval

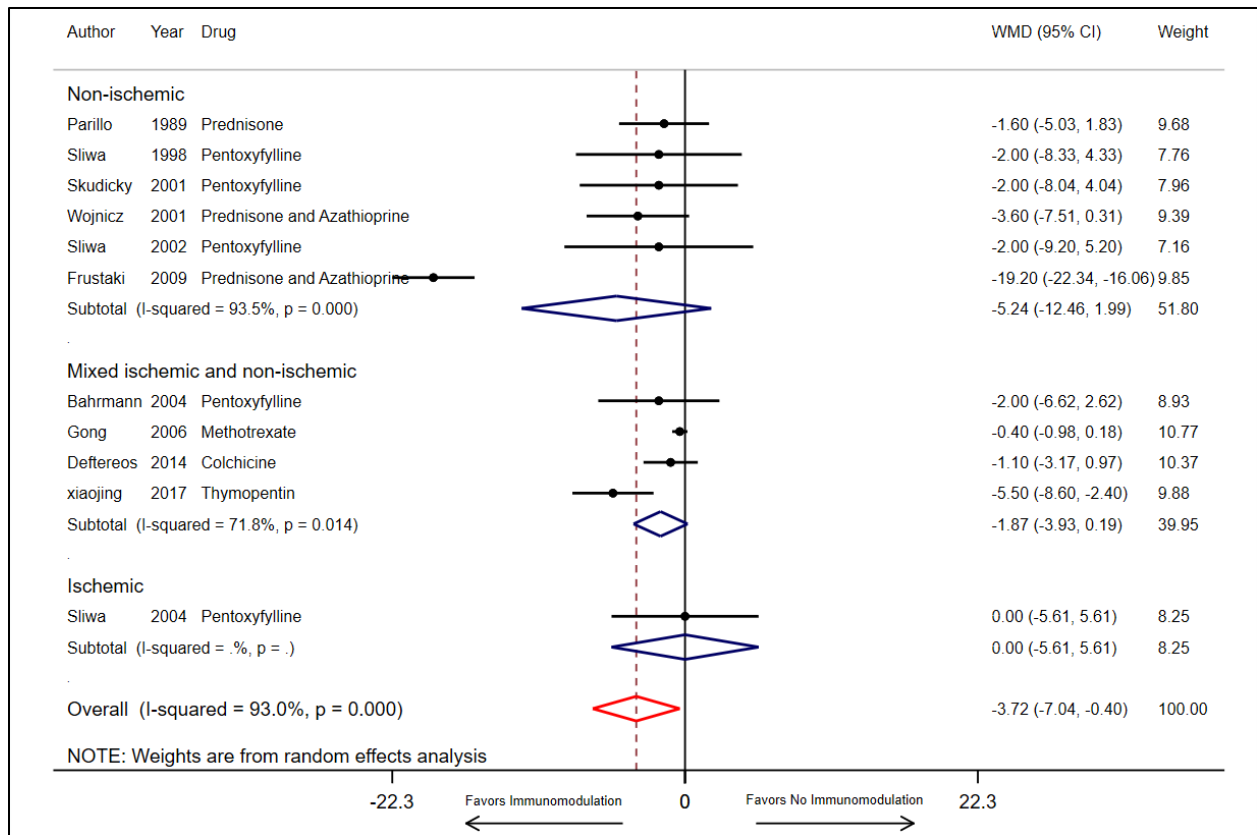

**S14 Supplement Figure 8:** Effect of immunomodulation on LVEDD as compared to no immunomodulation according to heart failure aetiology. Black solid square diamonds and associated solid lines represent summary RR and 95% CI of each trial listed in the left column. The numerical estimates in the right columns are weighted mean difference(s) (WMD) with 95% CI of each trial listed in the left column. The hollow blue diamond is summary WMD and 95% CI for immunomodulation as compared to no immunomodulation. The hollow red diamond is the overall summary WMD with 95% CI. CI: Confidence interval

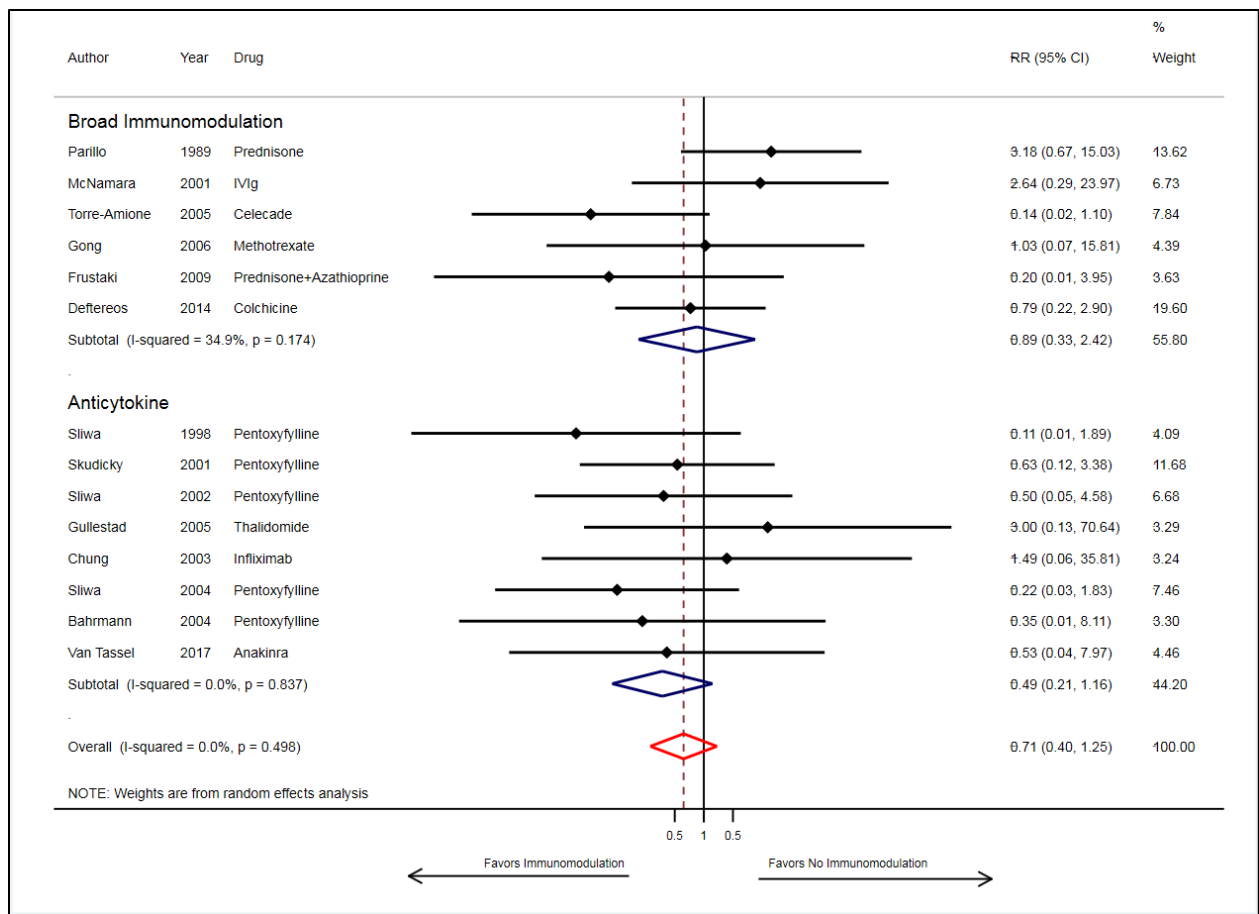

**S15 Supplement Figure 9:** Effect of immunomodulation on mortality as compared to no immunomodulation according to heart failure aetiology. Black solid square diamonds and associated solid lines represent summary RR and 95% CI of each trial listed in the left column. The numerical estimates in the right columns are the weighted mean difference(s) (WMD) with 95% CI of each trial listed in the left column. The hollow blue diamond is a summary WMD and 95% CI for immunomodulation as compared to no immunomodulation. The hollow red diamond is the overall summary RR with 95% CI. CI: Confidence interval

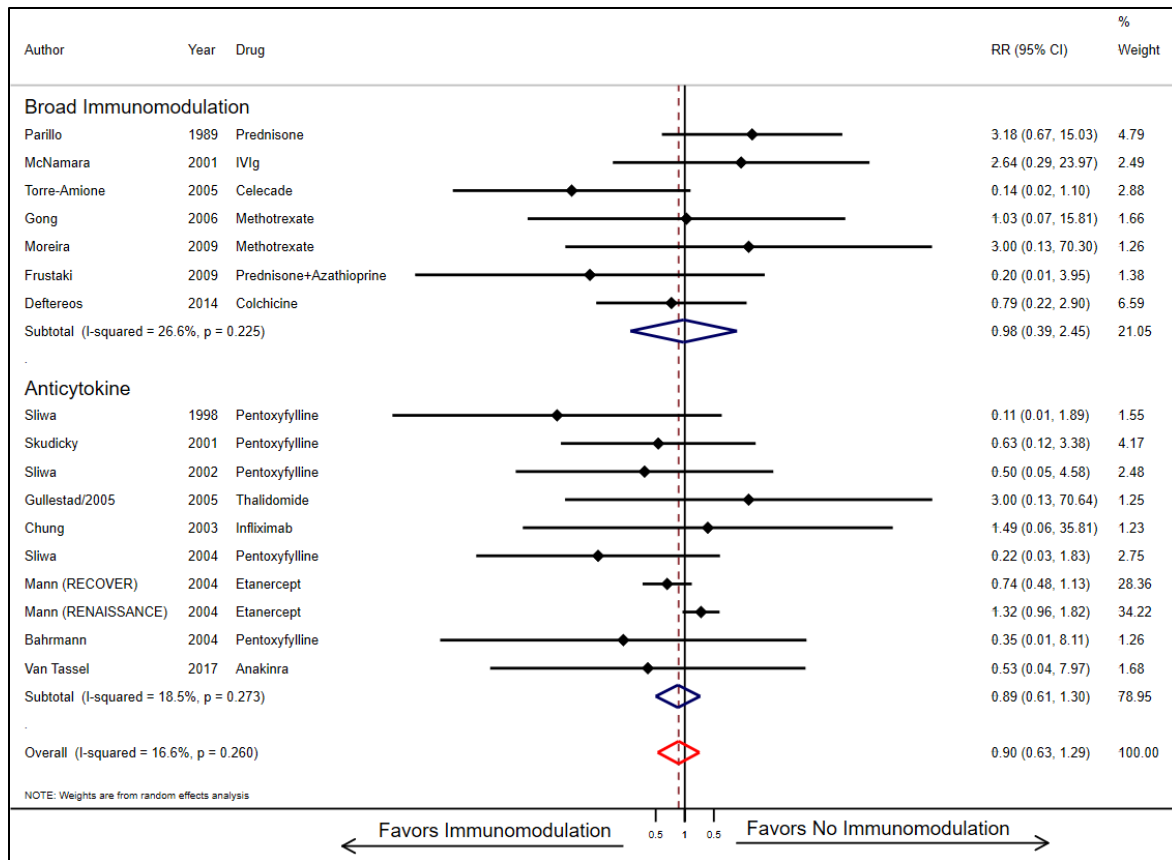

**S16 Supplement Figure 10:** Sensitivity analysis for effect of immunomodulation on mortality as compared to no immunomodulation according to heart failure aetiology in all trials reporting mortality data. Black solid square diamonds and associated solid lines represent summary RR and 95% CI of each trial listed in the left column. The numerical estimates in the right columns are weighted mean difference(s) (WMD) with 95% CI of each trial listed in the left column. The hollow blue diamond is summary WMD and 95% CI for immunomodulation as compared to no immunomodulation. The hollow red diamond is the overall summary RR with 95% CI. CI: Confidence interval

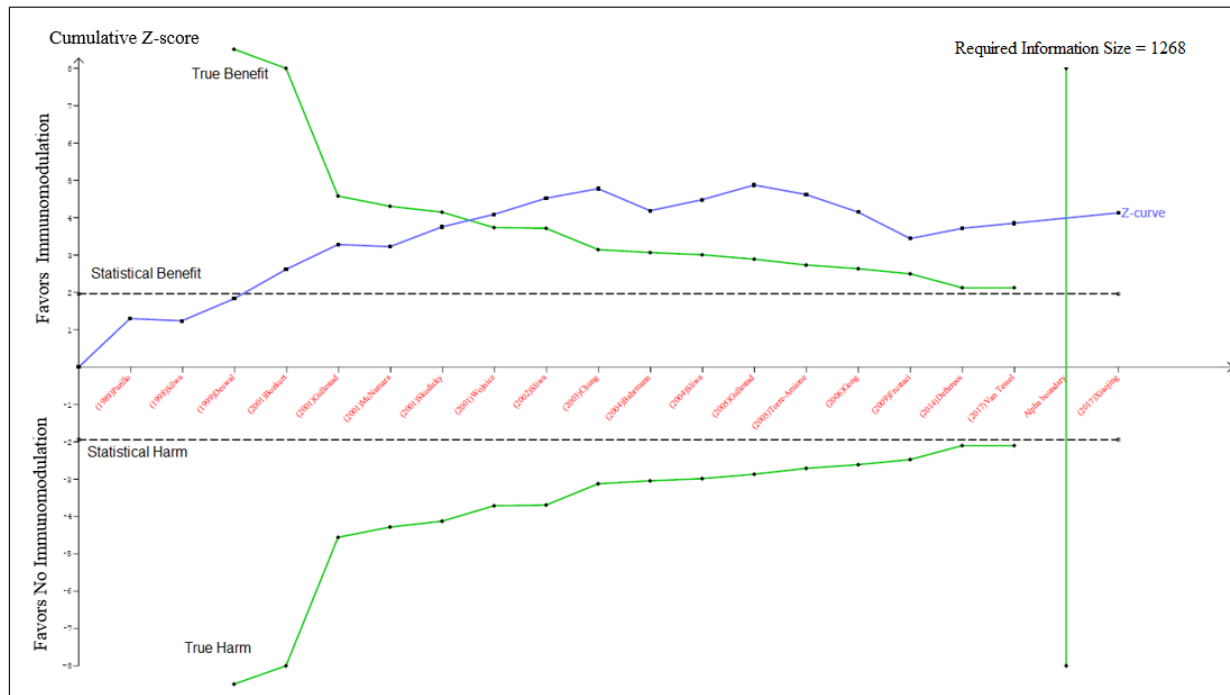

**S17 Supplement Figure 11:** Trial sequential analysis of immunomodulation vs. no immunomodulation in patients with heart failure for improvement in left ventricular ejection fraction (LVEF). The solid black line represents the line of no difference. The green lines above and below the line of no difference represent the O'Brien-Fleming trial sequential boundary for no benefit and benefit with immunomodulation, respectively. The solid black lines are upper and lower bounds for 95% CI. The green vertical line is the required information size for conclusive meta-analyses, given two-sided  $\alpha=0.05$  and  $\beta=0.20$ . The solid blue line is Z-curve derived from a random-effects meta-analysis of individual RCTs. The inner wedge represents the O'Brien-Fleming  $\beta$ -spending function at 80% power. The Z-curve surpassed the trial sequential boundary and the information size, indicating a true improvement in LVEF with immunomodulation as compared to no immunomodulation.

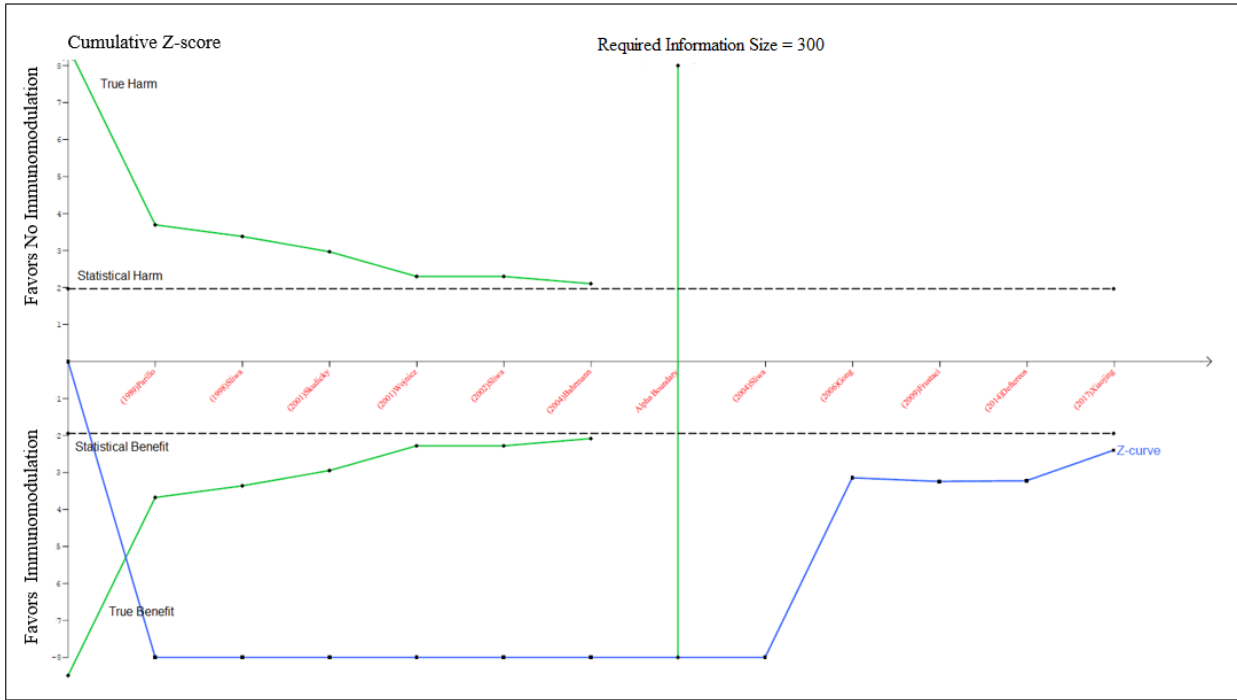

**S18 Supplement Figure 12:** Trial sequential analysis of immunomodulation vs. no immunomodulation in patients with heart failure for improvement in left ventricle end-diastolic dimension (LVEDD). The solid black line represents the line of no difference. The green lines above and below the line of no difference represent the O'Brien-Fleming trial sequential boundary for no benefit and benefit with immunomodulation, respectively. The solid black lines are upper and lower bounds for 95% CI. The green vertical line is the required information size for conclusive meta-analyses, given two-sided  $\alpha=0.05$  and  $\beta=0.20$ . The solid blue line is Z-curve derived from a random-effects meta-analysis of individual RCTs. The inner wedge represents the O'Brien-Fleming  $\beta$ -spending function at 80% power. The Z-curve surpassed the trial sequential boundary and the information size, indicating a true improvement in LVEDD with immunomodulation as compared to no immunomodulation.

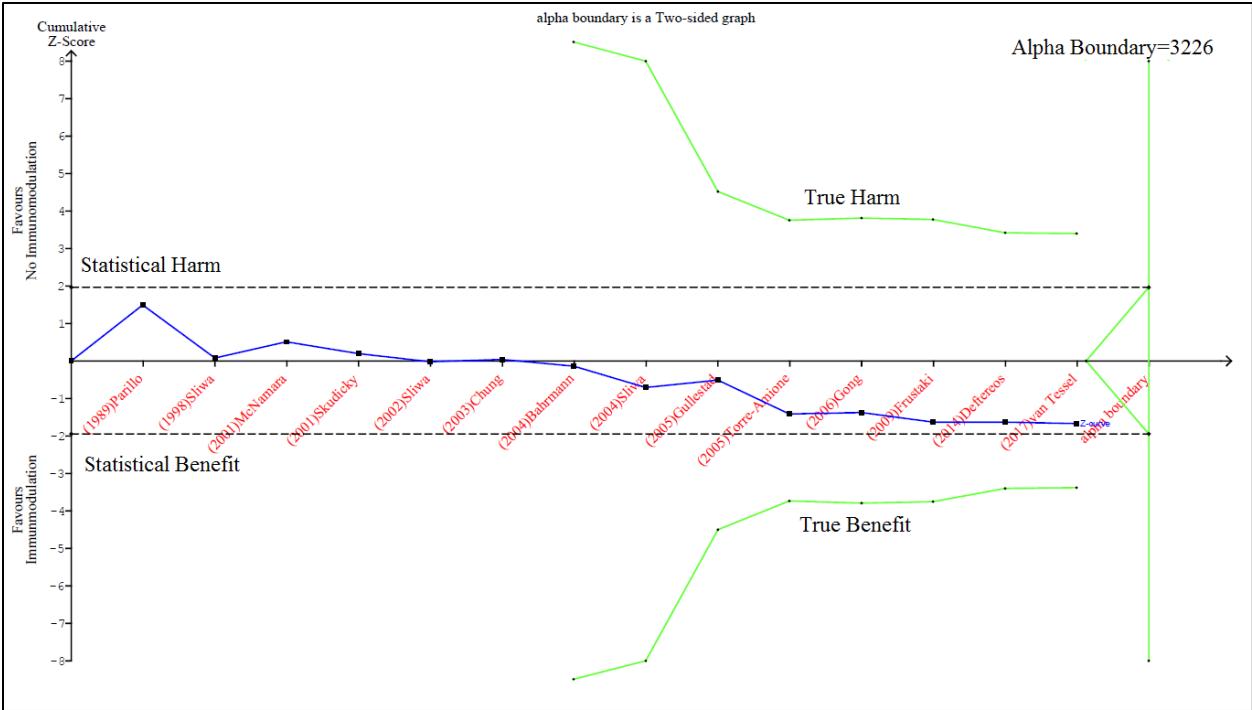

**S19 Supplement Figure 13:** Trial sequential analysis of immunomodulation vs. no immunomodulation in patients with heart failure for improvement in mortality. The solid black line represents the line of no difference. The solid black line represents the line of no difference. The green lines above and below the line of no difference represent the O'Brien-Fleming trial sequential boundary for no benefit and benefit with immunomodulation, respectively. The solid black lines are upper and lower bounds for 95% CI. The green vertical line is the required information size for conclusive meta-analyses, given two-sided  $\alpha=0.05$  and  $\beta=0.20$ . The solid blue line is Z-curve derived from a random-effects meta-analysis of individual RCTs. The inner wedge represents the O'Brien-Fleming  $\beta$ -spending function at 80% power. The Z-curve did not surpass the trial sequential boundary and the information size, indicating a lack of sufficient evidence to conclude effect on mortality with or without immunomodulation.



## References

1. Parrillo JE, Cunnion RE, Epstein SE, Parker MM, Suffredini AF, Brenner M, Schaer GL, Palmeri ST, Cannon RO, Alling D, Wittes JT, Ferrans VJ, Rodriguez ER, Fauci AS. A Prospective, Randomized, Controlled Trial of Prednisone for Dilated Cardiomyopathy. *New England Journal of Medicine*. 1989;321:1061-8.
2. Sliwa K, Skudicky D, Candy G, Wisenbaugh T, Sareli P. Randomised investigation of effects of pentoxifylline on left-ventricular performance in idiopathic dilated cardiomyopathy. *Lancet*. 1998;351:1091-3.
3. Deswal A, Bozkurt B, Seta Y, Parilti-Eiswirth S, Hayes FA, Blosch C, Mann DL. Safety and efficacy of a soluble P75 tumor necrosis factor receptor (Enbrel, etanercept) in patients with advanced heart failure. *Circulation*. 1999;99:3224-6.
4. Gullestad L, Aass H, Fjeld JG, Wikeby L, Andreassen AK, Ihlen H, Simonsen S, Kjekshus J, Nitter-Hauge S, Ueland T, Lien E, Froland SS, Aukrust P. Immunomodulating therapy with intravenous immunoglobulin in patients with chronic heart failure. *Circulation*. 2001;103:220-5.
5. McNamara DM, Holubkov R, Starling RC, Dec GW, Loh E, Torre-Amione G, Gass A, Janosko K, Tokarczyk T, Kessler P, Mann DL, Feldman AM. Controlled trial of intravenous immune globulin in recent-onset dilated cardiomyopathy. *Circulation*. 2001;103:2254-9.
6. Skudicky D, Bergemann A, Sliwa K, Candy G, Sareli P. Beneficial effects of pentoxifylline in patients with idiopathic dilated cardiomyopathy treated with angiotensin-converting enzyme inhibitors and carvedilol: results of a randomized study. *Circulation*. 2001;103:1083-8.
7. Bozkurt B, Torre-Amione G, Warren MS, Whitmore J, Soran OZ, Feldman AM, Mann DL. Results of targeted anti-tumor necrosis factor therapy with etanercept (ENBRELE) in patients with advanced heart failure. *Circulation*. 2001;103:1044-7.
8. Wojnicz R, Nowalany-Kozielska E, Wojciechowska C, Głanowska G, Wilczewski P, Niklewski T, Zembala M, Poloński L, Rozek Marius M, Wodniecki J. Randomized, Placebo-Controlled Study for Immunosuppressive Treatment of Inflammatory Dilated Cardiomyopathy. *Circulation*. 2001;104:39-45.
9. Sliwa K, Woodiwiss A, Candy G, Badenhorst D, Libhaber C, Norton G, Skudicky D, Sareli P. Effects of pentoxifylline on cytokine profiles and left ventricular performance in patients with decompensated congestive heart failure secondary to idiopathic dilated cardiomyopathy. *Am J Cardiol*. 2002;90:1118-22.
10. Chung ES, Packer M, Lo KH, Fasanmade AA, Willerson JT. Randomized, double-blind, placebo-controlled, pilot trial of infliximab, a chimeric monoclonal antibody to tumor necrosis factor-alpha, in patients with moderate-to-severe heart failure: results of the anti-TNF Therapy Against Congestive Heart Failure (ATTACH) trial. *Circulation*. 2003;107:3133-40.
11. Bahrman P, Hengst UM, Richartz BM, Figulla HR. Pentoxifylline in ischemic, hypertensive and idiopathic-dilated cardiomyopathy: effects on left-ventricular function, inflammatory cytokines and symptoms. *European journal of heart failure*. 2004;6:195-201.
12. Sliwa K, Woodiwiss A, Kone VN, Candy G, Badenhorst D, Norton G, Zambakides C, Peters F, Essop R. Therapy of ischemic cardiomyopathy with the immunomodulating agent pentoxifylline: results of a randomized study. *Circulation*. 2004;109:750-5.

13. Torre-Amione G, Sestier F, Radovancevic B, Young J. Broad modulation of tissue responses (immune activation) by celastrol may favorably influence pathologic processes associated with heart failure progression. *Am J Cardiol.* 2005;95:30C-7C; discussion 8C-40C.
14. Gullestad L, Ueland T, Fjeld JG, Holt E, Gundersen T, Breivik K, Folling M, Hodt A, Skardal R, Kjekshus J, Andreassen A, Kjekshus E, Wergeland R, Yndestad A, Froland SS, Semb AG, Aukrust P. Effect of thalidomide on cardiac remodeling in chronic heart failure: results of a double-blind, placebo-controlled study. *Circulation.* 2005;112:3408-14.
15. Gong K, Zhang Z, Sun X, Zhang X, Li A, Yan J, Luo Q, Gao Y, Feng Y. The nonspecific anti-inflammatory therapy with methotrexate for patients with chronic heart failure. *Am Heart J.* 2006;151:62-8.
16. Frustaci A, Russo MA, Chimenti C. Randomized study on the efficacy of immunosuppressive therapy in patients with virus-negative inflammatory cardiomyopathy: the TIMIC study. *Eur Heart J.* 2009;30:1995-2002.
17. Devereux S, Giannopoulos G, Panagopoulou V, Bouras G, Raisakis K, Kossyvakis C, Karageorgiou S, Papadimitriou C, Vastaki M, Kaoukis A, Angelidis C, Pagoni S, Pyrgakis V, Alexopoulos D, Manolis AS, Stefanadis C, Cleman MW. Anti-inflammatory treatment with colchicine in stable chronic heart failure: a prospective, randomized study. *JACC Heart Fail.* 2014;2:131-7.
18. Van Tassell BW, Abouzaki NA, Oddi Erdle C, Carbone S, Trankle CR, Melchior RD, Turlington JS, Thurber CJ, Christopher S, Dixon DL, Fronk DT, Thomas CS, Rose SW, Buckley LF, Dinarello CA, Biondi-Zoccai G, Abbate A. Interleukin-1 Blockade in Acute Decompensated Heart Failure: A Randomized, Double-Blinded, Placebo-Controlled Pilot Study. *Journal of cardiovascular pharmacology.* 2016;67:544-51.
19. Xiaojing C, Yanfang L, Yanqing G, Fangfang C. Thymopentin improves cardiac function in older patients with chronic heart failure. *Anatol J Cardiol.* 2017;17:24-30.
20. Higgins JP, Thompson SG. Quantifying heterogeneity in a meta-analysis. *Stat Med.* 2002;21:1539-58.
21. Begg CB, Mazumdar M. Operating characteristics of a rank correlation test for publication bias. *Biometrics.* 1994;50:1088-101.
22. Egger M, Davey Smith G, Schneider M, Minder C. Bias in meta-analysis detected by a simple, graphical test. *Bmj.* 1997;315:629-34.
23. Duval S, Tweedie R. Trim and fill: A simple funnel-plot-based method of testing and adjusting for publication bias in meta-analysis. *Biometrics.* 2000;56:455-63.
24. Ziadi MC. Myocardial flow reserve (MFR) with positron emission tomography (PET)/computed tomography (CT): clinical impact in diagnosis and prognosis. *Cardiovasc Diagn Ther.* 2017;7:206-18.
25. Wetterslev J, Jakobsen JC, Gluud C. Trial Sequential Analysis in systematic reviews with meta-analysis. *BMC medical research methodology.* 2017;17:39.
26. Miladinovic B, Djulbegovic B. Trial sequential boundaries for cumulative meta-analyses. *Stata Journal* 2013;13(1):77-91.
27. Lau J, Antman EM, Jimenez-Silva J, Kupelnick B, Mosteller F, Chalmers TC. Cumulative meta-analysis of therapeutic trials for myocardial infarction. *N Engl J Med.* 1992;327:248-54.
28. Sterne JAC, Page MJ, Elbers RG, Blencowe NS, Boutron I, Cates CJ, Cheng H-Y, Corbett MS, Eldridge SM, Hernán MA, Hopewell S, Hróbjartsson A, Junqueira DR, Jüni P, Kirkham JJ, Lasserson T, Li T, McAleenan A, Reeves BC, Shepperd S, Shrier I, Stewart LA,

Tilling K, White IR, Whiting PF, Higgins JPT. RoB 2: a revised tool for assessing risk of bias in randomised trials. *BMJ* (in press).

**END OF SUPPLEMENT**
